# Supplementary material
Source: publisher figshare collection journal article supplement (https://geolsoc.figshare.com/ndownloader/files/25819985)
Supplement: Supplementary file 1 [file 25819985]

## Sheet: Sheet1
Sample	Total Points		Components (%)				Quartz				Feldspar				Lithics					Porosity (%)						Contacts (%)							Sample	Cements (Counts)												Grain-size (%)
			Quartz	Feldspars	Lithics		Monoccrystaline	Pollycristalline	Deformed		Plagioclase	Microcline	Orthoclase		Metamorphic	Plutonic	Volcanic	Sedimentary		Primary	Moldic	Intragranular	Total	IGV		Flot	Point	Linear	Concave-convex	Sutured	Total			Zeolite	Quartz	Calcite	Smectite	Ilite	Albite	Chlorite	Iron Oxide	Gypsum	Dolomite	Total		Silt	Very fine sand	Fine sand	medium sand
RB-00	300		59.9222	22.9572	17.1206		90.9091	1.94805	7.14286		46	52	2		13.6364	50	27.2727	9.09091		0	0	0.333333	0.333333	22		0.371058	19.295	48.7941	26.1596	5.38033	100		RB-00	0	1	0	0	0	0	5	3	0	56	65		10.1351	16.2162	27.027	24.3243
RB-03	356		64.4737	21.7105	13.8158		93.3673	0.510204	6.12245		43.5484	53.2258	3.22581		5.12821	76.9231	15.3846	2.5641		16.0112	0.280899	4.77528	21.0674	23.5955		0.213904	28.4492	42.8877	21.2834	7.16578	100		RB-03	0	0	2	5	0	0	0	2	0	0	9		4.10959	8.90411	21.9178	28.0822
RB-06	303		65.1982	25.1101	9.69163		86.4865	0.675676	12.8378		36.9565	60.8696	2.17391		26.3158	47.3684	26.3158	0		4.62046	0.990099	5.61056	11.2211	31.6832		1.26582	31.4647	30.5606	30.0181	6.69078	100		RB-06	0	0	0	6	0	0	0	0	0	56	62		8.63309	16.5468	13.6691	39.5683
RB-07	300		64.1256	27.8027	8.07175		89.5105	0	10.4895		48	46	6		5.55556	66.6667	16.6667	11.1111		9.33333	1	3	13.3333	29.6667		0.666667	35.5	34.5	23.1667	6.16667	100		RB-07	0	0	36	11	0	2	0	0	0	0	49		9.15493	23.2394	30.9859	27.4648
RB-11	303		56.5957	36.5957	6.80851		91.7293	2.25564	6.01504		39.5062	53.0864	7.40741		0	62.5	37.5	0		3.63036	0	0.330033	3.9604	15.1815		0	15.9122	17.5583	44.856	21.6735	100		RB-11	0	24	0	7	0	0	1	2	0	0	34		3.75	9.375	32.5	46.25
RB-13	304		72.8395	20.9877	6.17284		85.3107	2.25989	12.4294		40	57.5	2.5		13.3333	53.3333	33.3333	0		14.1447	0.657895	2.96053	17.7632	24.0132		0	22.0126	29.1405	40.2516	8.59539	100		RB-13	0	0	0	19	0	0	0	0	0	0	19		3.26797	32.0261	41.8301	16.3399
RB-20	300		68.9655	22.8448	8.18966		92.5	0.625	6.875		42.5532	57.4468	0		0	68.4211	21.0526	10.5263		14.3333	1.33333	2.33333	18	26.3333		0.248447	23.6025	36.5217	29.5652	10.0621	100		RB-20	0	0	19	5	0	0	0	1	0	0	25		2.7972	15.3846	13.2867	31.4685
RB-21	204		67.8571	24.6032	7.53968		93.5673	0	6.43275		49.0909	43.6364	7.27273		13.3333	66.6667	13.3333	6.66667		12	1.33333	3.33333	16.6667	22.3333		0.138696	17.6144	38.1415	34.6741	9.43135	100		RB-21	0	0	0	16	0	0	0	1	0	0	17		9.61538	29.4872	30.7692	28.2051
RB-33	204		66.2602	21.9512	11.7886		84.0491	3.06748	12.8834		19.1489	70.2128	10.6383		3.84615	73.0769	15.3846	7.69231		0.666667	0.666667	0	1.33333	21.3333		0.609756	32.439	36.8293	25.7317	4.39024	100		RB-33	0	0	0	0	0	0	60	0	0	0	60		16.8831	27.2727	11.039	14.9351
RB-34	204		66.3866	23.9496	9.66387		94.9367	0	5.06329		43.1373	50.9804	5.88235		9.09091	59.0909	27.2727	4.54545		14.658	0.325733	1.62866	16.6124	27.6873		0	25.2071	41.7751	29.3491	3.66864	100		RB-34	1	0	29	4	0	0	0	0	0	0	34		8.16327	24.4898	17.0068	21.0884
RB-45	300		68.75	23.75	7.5		92.1212	0	7.87879		44.898	44.898	10.2041		6.66667	66.6667	20	6.66667		10.231	0.660066	3.30033	14.1914	25.7426		0.147929	17.4556	44.3787	36.6864	1.33136	100		RB-45	6	0	22	5	0	0	0	0	2	0	35		3.28947	29.6053	42.7632	15.7895
RB-46	303		64.7727	24.2424	10.9848		85.3801	0	14.6199		51.7857	44.6429	3.57143		6.89655	48.2759	41.3793	3.44828		2.31023	0	4.62046	6.93069	19.802		0	13.0027	48.7936	32.7078	5.49598	100		RB-46	0	1	35	3	0	0	0	0	0	0	39		4.51613	22.5806	32.2581	30.3226
RB-48	300		66.2222	27.5556	6.22222		97.3154	0.671141	2.01342		62.2642	26.4151	11.3208		7.14286	64.2857	21.4286	7.14286		7.84314	0.326797	1.63399	9.80392	26.4706		0.163666	16.2029	46.9722	34.3699	2.29133	100		RB-48	0	24	19	8	0	0	0	0	0	0	51		4.25532	45.3901	24.1135	16.3121
RB-49	300		60.4317	27.6978	11.8705		86.9048	1.19048	11.9048		56.8966	29.3103	13.7931		3.125	75	15.625	6.25		7.66667	1.33333	1.33333	10.3333	17.6667		0.106724	11.0993	41.9424	41.8356	5.01601	100		RB-49	0	3	6	12	0	1	0	0	0	0	22		7.40741	33.9506	17.9012	20.3704
RB-55	300		62.1019	21.3376	16.5605		64.1026	0	35.8974		30.3571	64.2857	5.35714		17.3077	75	7.69231	0		7.6412	0.332226	2.65781	10.6312	13.9535		0	5.29101	33.6508	33.3333	27.7249	100		RB-55	0	4	0	5	0	0	0	1	0	0	10		1.14286	3.42857	11.4286	13.7143
RB-60	204		53.937	33.8583	12.2047		91.9708	0.729927	7.29927		41.5385	56.9231	1.53846		6.66667	70	23.3333	0		14.3333	1	2.33333	17.6667	24.6667		0	17.0629	52.4476	26.4336	4.05594	100		RB-60	0	1	2	15	0	1	0	2	0	0	21		0.645161	5.80645	20.6452	51.6129
RB-63	321		78.2222	16	5.77778		96.5714	0	3.42857		26.3158	52.6316	21.0526		0	84.6154	15.3846	0		4.04984	2.18069	1.24611	7.47664	30.5296		1.3245	18.3223	66.0044	14.3488	0	100		RB-63	26	5	43	0	0	0	0	0	0	0	74		2.18978	5.83942	28.4672	32.1168
RB-64	310		57.8571	35	7.14286		93.2099	1.85185	4.93827		40.2778	50	9.72222		10	65	25	0		0	0	1.6129	1.6129	12.9032		0	2.47525	28.0941	49.7525	19.6782	100		RB-64	0	5	24	0	0	0	0	2	0	4	35		5.23256	11.6279	47.093	34.8837
RB-65	300		65.3846	25.3846	9.23077		91.7647	0.588235	7.64706		32.7273	49.0909	18.1818		12.5	70.8333	16.6667	0		14	1	1.66667	16.6667	19		0.3367	7.57576	46.633	44.6128	0.841751	100		RB-65	0	3	2	0	0	1	0	1	0	0	7		3.75	11.25	51.25	28.75
RB-69	305		66.2021	21.9512	11.8467		81.0526	1.57895	17.3684		36.8421	54.386	8.77193		3.0303	81.8182	9.09091	6.06061		13.7705	0.327869	1.63934	15.7377	16.7213		0.30722	7.68049	51.6129	39.3241	1.07527	100		RB-69	0	0	0	0	0	3	0	0	0	0	3		1.16279	1.16279	9.30233	41.8605
RB-71	312		67.6157	23.8434	8.54093		95.7895	0	4.21053		33.9286	51.7857	14.2857		16.6667	75	8.33333	0		10.8974	0.320513	1.60256	12.8205	17.6282		0	4.61361	52.7105	34.2561	8.41984	100		RB-71	3	0	4	0	0	7	0	0	1	0	15		1.20482	2.40964	16.8675	32.5301
[truncated: 9 more columns]
